# Supplementary material
Source: Springer Nature journal article supplement (https://www.springermedizin.de/resource/supplementary/13054_2009_7626_MOESM4_ESM.pdf/9730184)

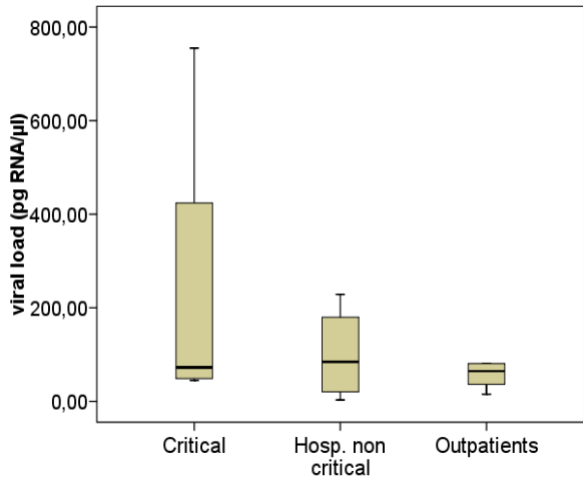

Supplement: MOESM4 [file 9730184]
